# Supplementary material for: Promotion of sugar–lectin recognition through the multiple sugar presentation offered by regioselectively addressable functionalized templates (RAFT): a QCM-D and SPR study
Source: Royal Society of Chemistry journal article supplement (doi:10.1039/b716214f), 2008-01-01
Supplement: b716214f.pdf [file b716214f.pdf]

## Supplementary Informations

### **Promotion of sugar - lectin recognition through multiple sugar presentation offered by Regioselectively Addressable Functionalized Templates (RAFT): a QCM-D and SPR study**

*Marie Wilczewski, Angéline Van der Heyden\*, Olivier Renaudet, Pascal Dumy, Liliane Guérente and  
Pierre Labbé\**

Département de Chimie Moléculaire - Equipe Ingénierie et Interactions BioMoléculaires, UMR-5250,  
ICMG FR-2607, CNRS, Université Joseph Fourier - BP 53, 38 041 GRENOBLE cedex 9, France

### Characterization of the grafting of thiolated RAFT ligands on gold surfaces

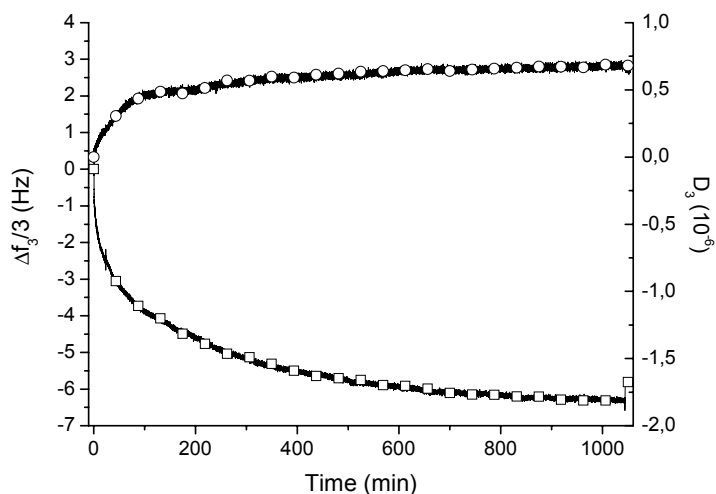

**Fig. ESI-1.** QCM-D responses, normalized frequency shift  $\Delta f_n/n$  ( ) and energy dissipation  $D_n$  (○) for the third overtones ( $n=3$ ), recorded during the grafting of thiolated RAFT-(Man)<sub>1</sub> (0.1 M in water) on a gold coated QCM-D transducer.

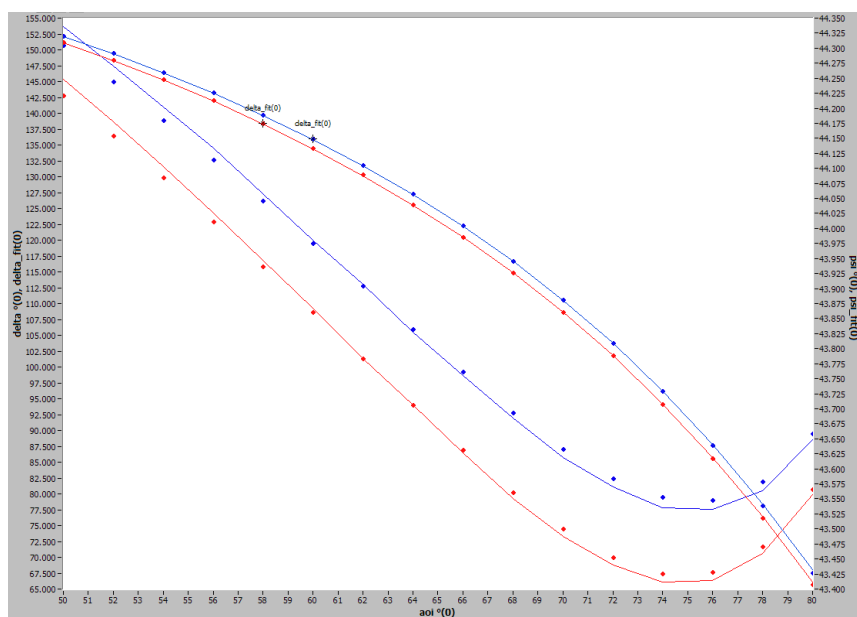

**Fig. ESI-2.** Ellipsometric measurements: Experimental  $\Delta$  and  $\psi$  values (lines) and best fits (points) as a function of incidence angle measured on the bare gold substrate (blue) and RAFT modified substrate (red). The optical properties of substrate were fitted using a two-phase model (substrate/ambient air) and gave the following values:  $n_s = 0.201 \pm 0.011$ ;  $k_s = 3.611 \pm 0.011$  (mse = 0.97). These values were used to fit the data of 20 % RAFT-(Man)<sub>1</sub> modified substrate using a three-phase model (substrate/RAFT

layer/ambient air). Using fixed values  $n = 1.45$  and  $k = 0.01$ , the thickness of the RAFT layer could be obtained:  $d = 2.26 \pm 0.16$  (mse = 2.66)

**Table ESI-1.** Summary of optical properties and thickness of various RAFT-Man modified gold substrates obtained by fitting  $\Delta$  and  $\psi$  data (for incidence angle varying from  $50^\circ$  to  $80^\circ$ , by  $2^\circ$  step). The optical properties of substrate ( $n_s$ ,  $k_s$ ) were fitted using a two-phase model (substrate/ambient air). These values were used to fit the data of RAFT modified substrate using a three-phase model (substrate/RAFT layer/ambient air). The thickness ( $d$ ) of the RAFT –layer was obtained assuming fixed values  $n = 1.45$  and  $k = 0.01$

|                   | RAFT-Man modified substrate |                    |                    |                    |                    |                    |                    |                    |                    |                    |
|-------------------|-----------------------------|--------------------|--------------------|--------------------|--------------------|--------------------|--------------------|--------------------|--------------------|--------------------|
|                   | 100%                        |                    | 33%                |                    | 20%                |                    | 10%                |                    | 5%                 |                    |
|                   | (Man) <sub>1</sub>          | (Man) <sub>4</sub> | (Man) <sub>1</sub> | (Man) <sub>4</sub> | (Man) <sub>1</sub> | (Man) <sub>4</sub> | (Man) <sub>1</sub> | (Man) <sub>4</sub> | (Man) <sub>1</sub> | (Man) <sub>4</sub> |
| $n_s (\pm 0.011)$ | 0.196                       | 0.188              | 0.216              | 0.196              | 0.201              | 0.206              | 0.200              | 0.189              | 0.213              | 0.185              |
| $k_s (\pm 0.011)$ | 3.603                       | 3.548              | 3.509              | 3.568              | 3.611              | 3.625              | 3.625              | 3.599              | 3.581              | 3.583              |
| $d$ (nm)          | 1.84                        | 1.96               | 1.87               | 1.91               | 2.26               | 2.71               | 2.87               | 1.97               | 1.92               | 2.16               |

**Con A interactions with RAFT-(Man)<sub>1</sub> and RAFT-(Man)<sub>4</sub> surfaces studied by QCM-D**

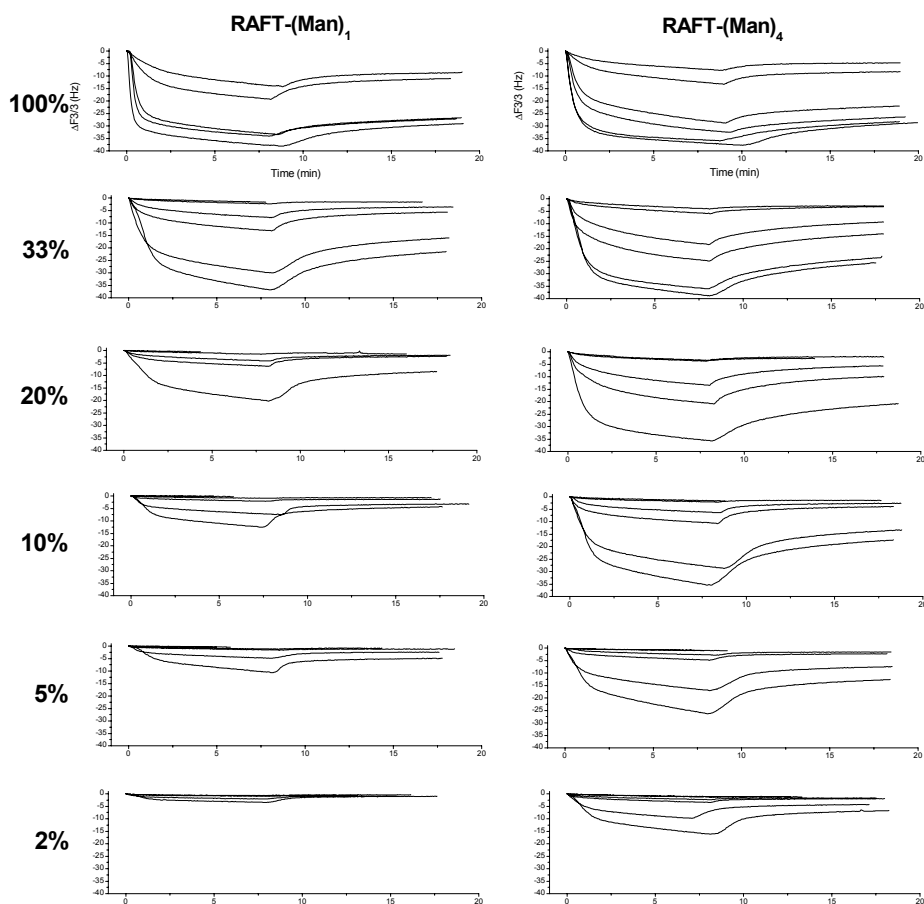

**Fig. ESI-3.** QCM-D response obtained for adsorption/desorption of Con A (from 0.049  $\mu\text{M}$  to 9.8  $\mu\text{M}$ , performed on RAFT-(Man)<sub>1</sub> and RAFT-(Man)<sub>4</sub> surfaces obtained by adsorption of solutions at six various RAFT-Mannose dilutions from 2% to 100 %. For clarity, only the frequency shift  $\Delta f_{n/n}$  recorded for the third overtone is presented. Surface regeneration is performed by successive injections of 25 mM mannose solution and SDS 0.05 %. The experiments were performed in flow mode at 100  $\mu\text{L}\cdot\text{min}^{-1}$ .

**Analysis of Con A binding using the rectangular hyperbolic relationship.**

Quantification of multivalent interactions has been performed by applying the method reported by Winzor and co-workers<sup>1, 2</sup> for determining the affinity constant and the concentration of binding sites on the surface for multivalent interactions. This tool is based on the modified rectangular hyperbolic relationship (1):

$$Y = \frac{K_{AX}C_x^* \times X}{1 + K_{AX} \times X} \quad (1)$$

where  $Y = 2C_A^{*1/2}(C_A^{*1/2} + C_A^{1/2})$  represents the Con A effective bound concentration and  $X = 2C_A^{*1/2} C_A^{1/2}$  represents the effective injected concentration of Con A. From the raw SPR data at equilibrium, a plot of Y versus X can be generated (fig. ESI 3) from which the intrinsic dissociation constant  $K_{DX}$  and the effective concentration of binding sites  $C_x$  can be extracted.

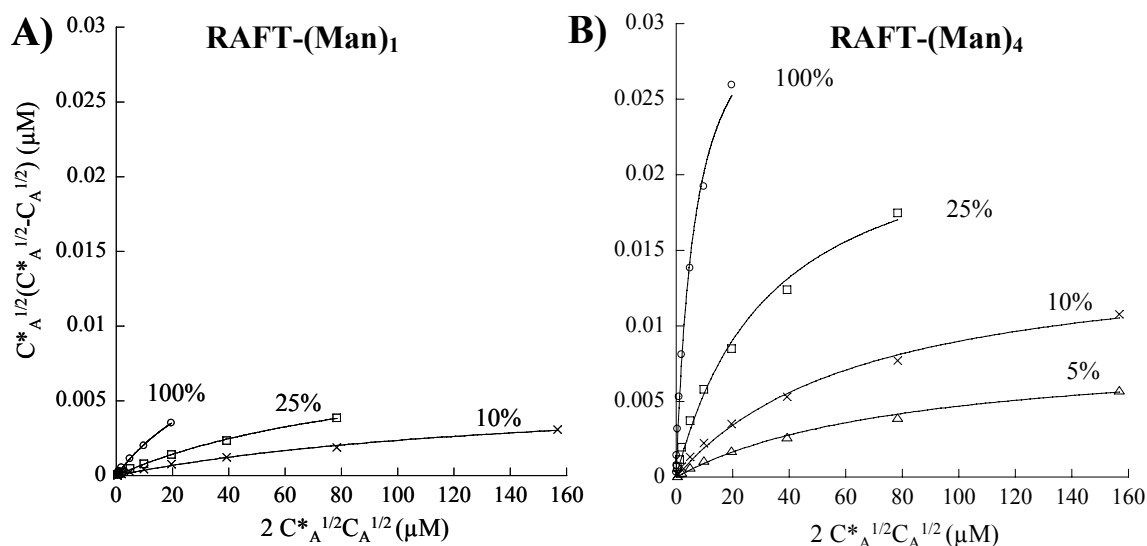

**Fig. ESI-4.** Plot of the effective concentration of Con A as a function of the effective injected concentration of ConA, as calculated from the raw SPR data obtained at equilibrium for the interaction of Con A with (A) RAFT-(Man)<sub>1</sub> and (B) RAFT-(Man)<sub>4</sub> surfaces at various RAFT-Mannose surface densities. The curves represent the best fits obtained from the modified rectangular hyperbolic relationship (1), by assuming a bivalent interaction of Con A with the surface ( $f = 2$ ).

1 S. J. Harris, C. M. Jackson and D. J. Winzor, *Arch. Biochem. Biophys.*, 1995, **316**, 20-23.

- 2 N. L. Kalinin, L. D. Ward and D. J. Winzor, *Anal. Biochem.*, 1995, **228**, 238-244.
